# Supplementary material for: Strong red and NIR emission in NaYF4:Yb3+,Tm3+/QDs nanoheterostructures
Source: Royal Society of Chemistry journal article supplement (doi:10.1039/c2tc00184e), 2012-12-05
Supplement: c2tc00184e.pdf [file c2tc00184e.pdf]

## Supporting information

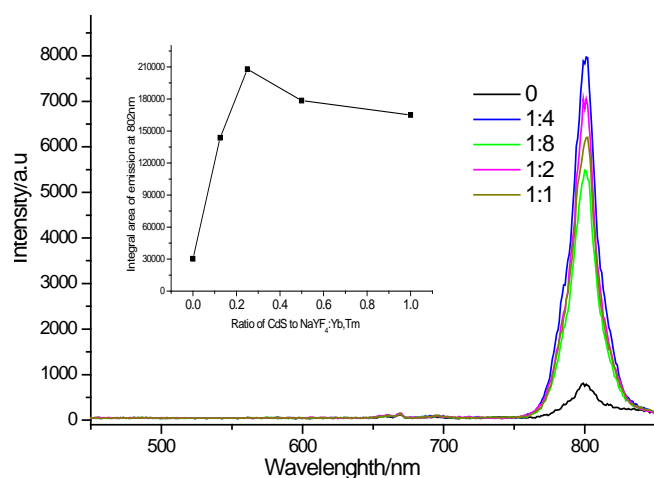

**Figure S1.** Upconverted fluorescence spectra of NaYF<sub>4</sub>: Yb<sup>3+</sup>, Tm<sup>3+</sup> /CdS nanoheterostructure with different ratio of CdS to NaYF<sub>4</sub>: Yb<sup>3+</sup>, Tm<sup>3+</sup> (excited by 980nm laser with same power). The inset figure was the integral area of 802nm emission with different ratio of CdS to NaYF<sub>4</sub>: Yb<sup>3+</sup>, Tm<sup>3+</sup>

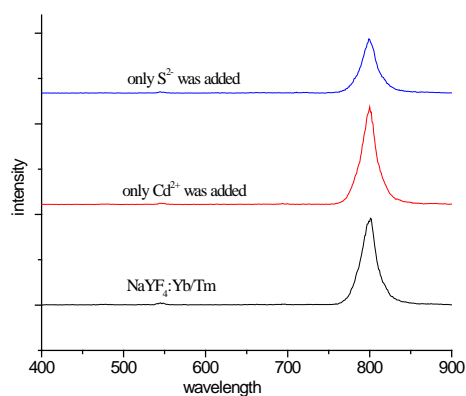

**Figure S2.** The effect of Cd<sup>2+</sup> and S<sup>2-</sup> on the upconverted fluorescence spectrum of NaYF<sub>4</sub> : Yb,Tm

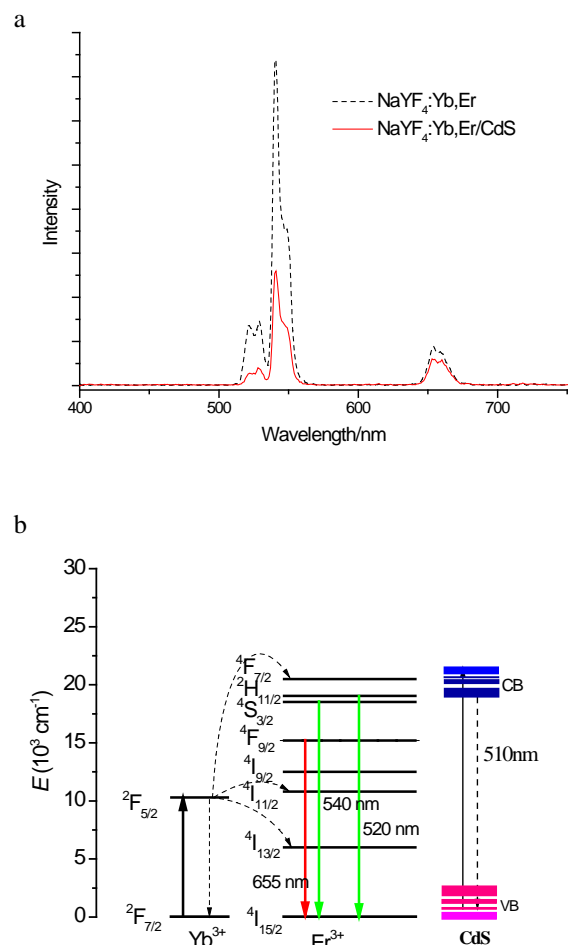

**Figure S3.** a. Upconverted fluorescence spectra of NaYF<sub>4</sub>: Yb<sup>3+</sup>, Er<sup>3+</sup> nanocrystals and NaYF<sub>4</sub>: Yb<sup>3+</sup>, Er<sup>3+</sup>/CdS nanoheterostructure excited with same power laser (980nm), b. Schematic of the excitation of NaYF<sub>4</sub>: Yb<sup>3+</sup>, Er<sup>3+</sup> and energy level of NaYF<sub>4</sub>: Yb<sup>3+</sup>, Er<sup>3+</sup> and CdS

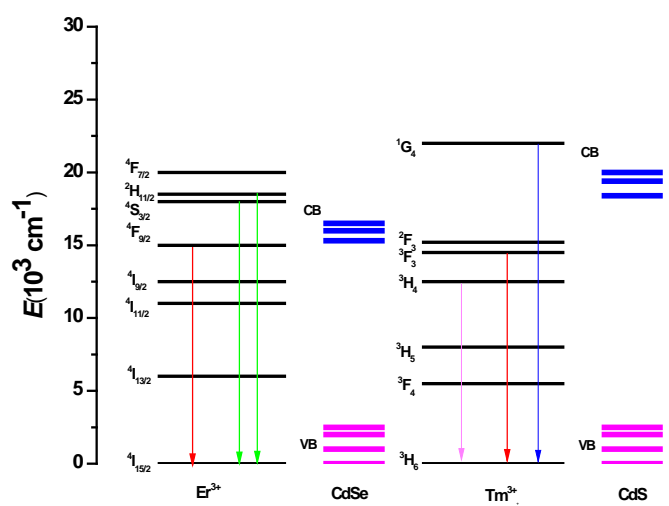

**Figure S4.** Schematic diagram of the energy level of Er<sup>3+</sup>, Tm<sup>3+</sup>, CdS and CdSe

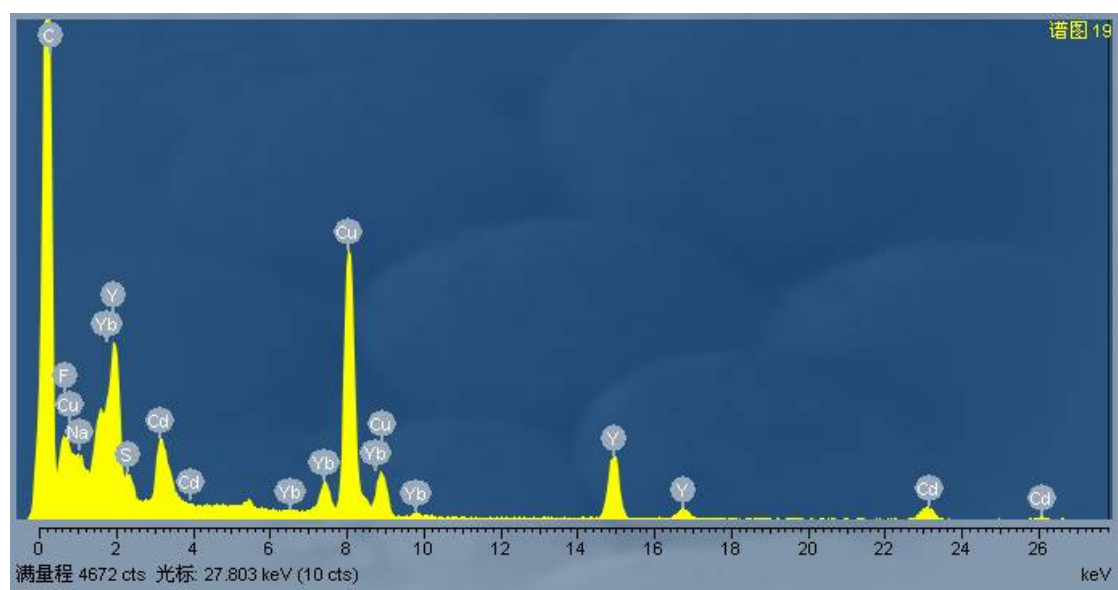

**Figure S5.** EDX spectrum of NaYF<sub>4</sub>:Yb,Tm/CdS hnanoeterostructures, indicating the presence of elements of Na, Y, F, Yb, Cd, S.
